# Supplementary material
Source: MDPI journal article supplement (https://www.mdpi.com/2071-1050/13/12/6672)
Supplement: s1 [file s1 › sustainability-1212366-SI.pdf]

# Analysis of the Dynamical Capabilities into the Public Research Institutes to their Strategic Decision-Making

A.E. Rodríguez Salazar<sup>1,2\*</sup>, M.A. Domínguez Crespo<sup>3</sup>, A. M. Torres-Huerta<sup>3</sup>, A.I. Licona-Aguilar<sup>4</sup>, A. Nivón-Pellón<sup>1</sup>, V.N. Orta-Guzmán<sup>4</sup>.

**Table S1. Questionnaire elaborated in the first stage from framework of DCs for Mexican public research institutes, considering the period of time of January 2014 to December 2019.**

| Question number (Q) | Sensing capabilities                                                                                                                                    |
|---------------------|---------------------------------------------------------------------------------------------------------------------------------------------------------|
| 1                   | How many researchers work at the Public Research Institute?                                                                                             |
| 2                   | How many technical research support staff work at PRI?                                                                                                  |
| 3                   | How many research lines are developed in the research center                                                                                            |
| 4                   | What percentage of the developed research at the center is focused on basic science?                                                                    |
| 5                   | What percentage of the carried out research is focused on applied science?                                                                              |
| 6                   | What percentage of the developed research is focused on R&D?                                                                                            |
| 7                   | For the new research development and / or change of the research in development trajectory, are scientific publications (papers and patents) consulted? |
| 8                   | For the new research development and / or change of the research in development trajectory, are relevance studies carried out?                          |
| 9                   | For the new research development and / or change of the research in development trajectory, are market studies carried out?                             |
| 10                  | For the new research development and / or change of the research in development trajectory, are SWOT analysis carried out?                              |
| 11                  | For the new research development and / or change of the research in development trajectory, are environmental analyzes carried out?                     |
| 12                  | For the new research development and / or change of the research in development trajectory, is benchmarking performed?                                  |
| 13                  | For the new research development and / or change of the research in development trajectory, is bibliometrics used?                                      |
| 14                  | Is the experience of the researchers used to update the research lines?                                                                                 |
| 15                  | Is the information obtained in scientific and academic events used to update the lines of research?                                                     |
| 16                  | Is collaboration in national and / or international networks used to updated research lines?                                                            |
|                     | <b>Seizing capabilities</b>                                                                                                                             |
| 17                  | In what percentage of the investigations carried out are aimed at providing solutions in the short term.                                                |
| 18                  | In what percentage of the investigations carried out are aimed at providing solutions in the medium term                                                |
| 19                  | In what percentage of the investigations carried out are aimed at providing solutions in the long term.                                                 |
|                     | <b>Reconfiguration capabilities</b>                                                                                                                     |
| 20                  | Is your center currently developing projects related to the industry?                                                                                   |
| 21                  | Is your center currently developing projects related to public services?                                                                                |
| 22                  | Is your center currently competing to obtain projects through calls from state and / or federal authorities?                                            |
| 23                  | In order to strengthen and direct the lines of research to the future, studies of relevance trees are carried out?                                      |
| 24                  | In order to strengthen and direct the lines of research into the future, panels of experts are held                                                     |
| 25                  | In order to strengthen and direct the lines of research to the future, brainstorming is practiced                                                       |
| 26.                 | In order to strengthen and direct the lines of research to the future, is the Delphi method practiced?                                                  |
| 27.                 | In order to strengthen and direct the lines of research to the future, are questionnaires and / or surveys carried out?                                 |
| 28.                 | In order to strengthen and direct the lines of research into the future, is trend extrapolation practiced?                                              |
| 29.                 | In order to strengthen and direct the lines of research to the future, is cross-impact analysis practiced?                                              |
| 30.                 | In order to strengthen and direct the lines of research to the future, is time series analysis practiced?                                               |
| 31                  | In order to strengthen and direct the lines of research to the future, is the method of elaboration of scenarios used?                                  |

**Table S2. Second survey proposed to identify factors that impact in the global productivity and knowledge integration or transfer; considering the period of time of January 2014 to December 2019.**

| GENERAL DATA FOR PRI                                                                                                                                                                                                                                                                                                                                                                                                                                                                                                                                                                                                                                                                                          | KNOWLEDGE INTEGRATION OR TRANSFER                                                                                                                                                                                                                                                                                                                                                                                                                                                                                                                                                                                                                                                                                                                                                                                                                                                                                                                                                                                                                                                                                                                                                                                                                                                                                                                                                                                                                                                                                                                                                                                                                                                                   |
|---------------------------------------------------------------------------------------------------------------------------------------------------------------------------------------------------------------------------------------------------------------------------------------------------------------------------------------------------------------------------------------------------------------------------------------------------------------------------------------------------------------------------------------------------------------------------------------------------------------------------------------------------------------------------------------------------------------|-----------------------------------------------------------------------------------------------------------------------------------------------------------------------------------------------------------------------------------------------------------------------------------------------------------------------------------------------------------------------------------------------------------------------------------------------------------------------------------------------------------------------------------------------------------------------------------------------------------------------------------------------------------------------------------------------------------------------------------------------------------------------------------------------------------------------------------------------------------------------------------------------------------------------------------------------------------------------------------------------------------------------------------------------------------------------------------------------------------------------------------------------------------------------------------------------------------------------------------------------------------------------------------------------------------------------------------------------------------------------------------------------------------------------------------------------------------------------------------------------------------------------------------------------------------------------------------------------------------------------------------------------------------------------------------------------------|
| <p>S1. Name of each scientific and technological research centers/institutes belonging to the institution</p> <p>S2. Name of the locality where each research center/institute is placed, including main campus and each regional branch.</p> <p>S3. Total number of researchers, from each main campus and branch</p> <p>S4. Total number of the National Research System (SNI) members by level (Candidate, I, II, III, Emeritus), from each main campus and branch</p> <p>S5. Total number of research technical staff, from each main campus and branch</p>                                                                                                                                               | <p>S13. Total number of national or international patent applications from each main campus and branch</p> <p>S14. Total number of national or international patents granted, from each main campus and branch</p> <p>S15. Total number of applications for national or international utility models, from each main campus and branch</p> <p>S16. Total number of utility models granted (national or international) from each main campus and branch</p> <p>S17. Total number of registered (national or international) trademarks, from each main campus and branch</p> <p>S18. Total of technology transfers in process, from each main campus and branch national or international).</p> <p>S19. Total of technology transfers made, from each main campus and branch (national or international)</p> <p>S20. Total number of research groups (with national links), from each main campus and branch</p> <p>S21. Total number of research groups with international links, from each main campus and branch</p> <p>S22. Total number of national thematic networks to which researchers belong, from each main campus and branch</p> <p>S23. Total number of international thematic networks to which researchers belong, from each main campus and branch</p> <p>S24. Total number of projects related to the industry, from each main campus and branch</p> <p>S25. Total number of projects related to public services, from each main campus and branch</p> <p>S26. Total number of projects related to calls from federal/state institutions carried out by each main campus and branch</p> <p>S27. Total of technology foresight studies carried out by each main campus and branch</p> |
| PRODUCTIVITY                                                                                                                                                                                                                                                                                                                                                                                                                                                                                                                                                                                                                                                                                                  |                                                                                                                                                                                                                                                                                                                                                                                                                                                                                                                                                                                                                                                                                                                                                                                                                                                                                                                                                                                                                                                                                                                                                                                                                                                                                                                                                                                                                                                                                                                                                                                                                                                                                                     |
| <p>S6. Total number of research lines, from each main campus and branch</p> <p>S7. Total number of laboratories, from each main campus and branch</p> <p>S8. Total number of scientific articles published including JCR journals, articles published in national and peer-reviewed journals from each main campus and branch</p> <p>S9. Total number of book chapters published, from each main campus and branch</p> <p>S10. Total number of books published, from each main campus and branch</p> <p>S11. Total number of graduated students of postgraduate programs, from each main campus and branch</p> <p>S12. Total of quality-standard postgraduate programs , from each main campus and branch</p> |                                                                                                                                                                                                                                                                                                                                                                                                                                                                                                                                                                                                                                                                                                                                                                                                                                                                                                                                                                                                                                                                                                                                                                                                                                                                                                                                                                                                                                                                                                                                                                                                                                                                                                     |

**Table S3. Anova test and Pearson's correlation results carried out to evaluate the factors that impact the global productivity of PRI. The descriptive statistics were analyzed between the groups that presented a strong interaction in the first stage and the variables of the survey 2.**

|     | SENSING                                      |                                              |                                             |                                             |                                             |                                             | SEIZING                                     | RECONFIGURATION                             |                                             |                                             |
|-----|----------------------------------------------|----------------------------------------------|---------------------------------------------|---------------------------------------------|---------------------------------------------|---------------------------------------------|---------------------------------------------|---------------------------------------------|---------------------------------------------|---------------------------------------------|
|     | Q2                                           | Q3                                           | Q8                                          | Q12                                         | Q13                                         | Q16                                         | Q19                                         | Q23                                         | Q27                                         | Q29                                         |
| S7  | M: 21.12<br>F: 15.94<br>p: 0.001<br>r: 0.50  | M: 21.12<br>F: 53.61<br>p: 0.001<br>r: 0.73  | M: 21.12<br>F: 0.31<br>p: 0.582<br>r: -0.88 | M: 21.12<br>F: 0.04<br>p: 0.835<br>r: 0.03  | M: 21.12<br>F: 0.02<br>p: 0.905<br>r: 0.02  | M: 21.12<br>F: 1.84<br>p: 0.181<br>r: 0.19  | M: 21.12<br>F: 0.57<br>p: 0.456<br>r: 0.20  | M: 21.12<br>F: 0.16<br>p: 0.688<br>r: 0.06  | M: 21.12<br>F: 0.01<br>p: 0.923<br>r: 0.01  | M: 21.12<br>F: 0.61<br>p: 0.441<br>r: 0.11  |
| S8  | M: 431.22<br>F: 15.86<br>p: 0.001<br>r: 0.50 | M: 431.22<br>F: 13.46<br>p: 0.001<br>r: 0.47 | M: 431.22<br>F: 2.28<br>p: 0.137<br>r: 0.22 | M: 431.22<br>F: 1.78<br>p: 0.188<br>r: 0.19 | M: 431.22<br>F: 2.36<br>p: 0.131<br>r: 0.22 | M: 431.22<br>F: 3.36<br>p: 0.073<br>r: 0.26 | M: 431.22<br>F: 1.29<br>p: 0.261<br>r: 0.16 | M: 431.22<br>F: 0.99<br>p: 0.325<br>r: 0.14 | M: 431.22<br>F: 1.19<br>p: 0.280<br>r: 0.16 | M: 431.22<br>F: 5.90<br>p: 0.019<br>r: 0.33 |
| S9  | M: 36.61<br>F: 7.75<br>p: 0.008<br>r: 0.38   | M: 36.61<br>F: 8.18<br>p: 0.006<br>r: 0.39   | M: 36.61<br>F: 0.70<br>p: 0.406<br>r: 0.12  | M: 36.61<br>F: 1.07<br>p: 0.307<br>r: 0.15  | M: 36.61<br>F: 0.01<br>p: 0.915<br>r: 0.01  | M: 36.61<br>F: 2.61<br>p: 0.113<br>r: 0.22  | M: 36.61<br>F: 1.94<br>p: 0.170<br>r: 0.20  | M: 36.61<br>F: 0.79<br>p: 0.378<br>r: 0.13  | M: 36.61<br>F: 0.24<br>p: 0.622<br>r: 0.07  | M: 36.61<br>F: 1.51<br>p: 0.225<br>r: 0.18  |
| S10 | M: 6.89<br>F: 0.46<br>p: 0.502<br>r: 0.10    | M: 6.89<br>F: 3.89<br>p: 0.065<br>r: 0.28    | M: 6.89<br>F: 0.01<br>p: 0.931<br>r: 0.01   | M: 6.89<br>F: 2.36<br>p: 0.131<br>r: 0.22   | M: 6.89<br>F: 0.32<br>p: 0.577<br>r: 0.08   | M: 6.89<br>F: 2.81<br>p: 0.100<br>r: 0.24   | M: 6.89<br>F: 2.10<br>p: 0.158<br>r: 0.21   | M: 6.89<br>F: 1.00<br>p: 0.322<br>r: 0.15   | M: 6.89<br>F: 0.77<br>p: 0.384<br>r: 0.13   | M: 6.89<br>F: 11.37<br>p: 0.002<br>r: 0.44  |
| S11 | M: 130.41<br>F: 2.45<br>p: 0.124<br>r: 0.22  | M: 130.41<br>F: 2.11<br>p: 0.153<br>r: 0.20  | M: 130.41<br>F: 1.16<br>p: 0.287<br>r: 0.16 | M: 130.41<br>F: 0.24<br>p: 0.625<br>r: 0.07 | M: 130.41<br>F: 2.10<br>p: 0.154<br>r: 0.21 | M: 130.41<br>F: 1.41<br>p: 0.241<br>r: 0.17 | M: 130.41<br>F: 0.05<br>p: 0.828<br>r: 0.03 | M: 130.41<br>F: 2.03<br>p: 0.161<br>r: 0.20 | M: 130.41<br>F: 3.11<br>p: 0.084<br>r: 0.25 | M: 130.41<br>F: 4.39<br>p: 0.04<br>r: 0.30  |
| S12 | M: 21.12<br>F: 3.43<br>p: 0.070<br>r: 0.26   | M: 21.12<br>F: 8.78<br>p: 0.005<br>r: 0.40   | M: 21.12<br>F: 0.72<br>p: 0.399<br>r: 0.12  | M: 21.12<br>F: 5.80<br>p: 0.020<br>r: 0.33  | M: 21.12<br>F: 12.40<br>p: 0.001<br>r: 0.46 | M: 21.12<br>F: 1.52<br>p: 0.224<br>r: 0.18  | M: 21.12<br>F: 0.95<br>p: 0.335<br>r: 0.14  | M: 21.12<br>F: 10.19<br>p: 0.003<br>r: 0.42 | M: 21.12<br>F: 1.83<br>p: 0.182<br>r: 0.19  | M: 21.12<br>F: 6.49<br>p: 0.014<br>r: 0.35  |

Note: M is the mean of the data (N= 49), F is the fisher's exact test; higher values indicated the existence of a strong influence between analyzed variables, *p* is *statistical significance*  $\leq 0.05$  (*p*) *indicating a direct relation between variables*. *r* is the Pearson's correlation with a confidence value  $\geq 0.95$ .

**Table S4.** Anova test and Pearson's correlation results carried out to evaluate the factors that impact the knowledge integration or transfer of PRI. The descriptive statistic was analyzed between the groups that presented a strong interaction in the first stage and the variables of the survey 2.

|     | SENSING                                     |                                            |                                            |                                            |                                             |                                             | SEIZING                                     | RECONFIGURATION                            |                                             |                                            |
|-----|---------------------------------------------|--------------------------------------------|--------------------------------------------|--------------------------------------------|---------------------------------------------|---------------------------------------------|---------------------------------------------|--------------------------------------------|---------------------------------------------|--------------------------------------------|
|     | Q2                                          | Q3                                         | Q8                                         | Q12                                        | Q13                                         | Q16                                         | Q19                                         | Q23                                        | Q27                                         | Q29                                        |
| S13 | M: 15.51<br>F: 7.77.<br>p: 0.008<br>r: 0.38 | M: 15.51<br>F: 1.16<br>p: 0.287<br>r: 0.16 | M: 15.51<br>F: 0.09<br>p: 0.761<br>r: 0.04 | M: 15.51<br>F: 1.23<br>p: 0.272<br>r: 0.16 | M: 15.51<br>F: 0.03<br>p: 0.958<br>r: 0.01  | M: 15.51<br>F: 1.92<br>p: 0.171<br>r: 0.20  | M: 15.51<br>F: 0.54<br>p: 0.466<br>r: 0.11  | M: 15.51<br>F: 3.10<br>p: 0.088<br>r: 0.06 | M: 15.51<br>F: 0.29<br>p: 0.590<br>r: 0.01  | M: 15.51<br>F: 3.3<br>p: 0.076<br>r: 0.06  |
| S14 | M: 6.49<br>F: 3.67<br>p: 0.062<br>r: 0.27   | M: 6.49<br>F: 0.30<br>p: 0.586<br>r: 0.080 | M: 6.49<br>F: 0.20<br>p: 0.656<br>r: 0.06  | M: 6.49<br>F: 3.8<br>p: 0.057<br>r: 0.27   | M: 6.49<br>F: 0.07<br>p: 0.793<br>r: 0.03   | M: 6.49<br>F: 1.41<br>p: 0.241<br>r: 0.17   | M: 6.49<br>F: 1.11<br>p: 0.298<br>r: 0.15   | M: 6.49<br>F: 4.29<br>p: 0.044<br>r: 0.30  | M: 6.49<br>F: 1.26<br>p: 0.267<br>r: 0.16   | M: 6.49<br>F: 9.46<br>p: 0.004<br>r: 0.41  |
| S15 | M: 0.36<br>F: 1.85<br>p: 0.180<br>r: 0.19   | M: 0.36<br>F: 0.10<br>p: 0.749<br>r: 0.05  | M: 0.36<br>F: 0.36<br>p: 0.552<br>r: 0.09  | M: 0.36<br>F: 0.01<br>p: 0.969<br>r: 0.01  | M: 0.36<br>F: 1.00<br>p: 0.322<br>r: 0.15   | M: 0.36<br>F: 1.47<br>p: 0.232<br>r: 0.17   | M: 0.36<br>F: 0.12<br>p: 0.727<br>r: 0.05   | M: 0.36<br>F: 0.06<br>p: 0.810<br>r: 0.04  | M: 0.36<br>F: 0.02<br>p: 0.906<br>r: 0.02   | M: 0.36<br>F: 0.04<br>p: 0.839<br>r: 0.030 |
| S16 | M: 0.41<br>F: 0.83<br>p: 0.368<br>r: 0.13   | M: 0.41<br>F: 0.61<br>p: 0.439<br>r: 0.11  | M: 0.41<br>F: 0.41<br>p: 0.525<br>r: 0.09  | M: 0.41<br>F: 2.79<br>p: 0.107<br>r: 0.23  | M: 0.41<br>F: 1.42<br>p: 0.239<br>r: 0.17   | M: 0.41<br>F: 0.03<br>p: 0.864<br>r: 0.03   | M: 0.41<br>F: 0.33<br>p: 0.571<br>r: 0.08   | M: 0.41<br>F: 11.37<br>p: 0.020<br>r: 0.44 | M: 0.41<br>F: 0.04<br>p: 0.837<br>r: 0.03   | M: 0.41<br>F: 0.28<br>p: 0.601<br>r: 0.08  |
| S17 | M: 2.18<br>F: 2.59<br>p: 0.114<br>r: 0.23   | M: 2.18<br>F: 3.18<br>p: 0.081<br>r: 0.25  | M: 2.18<br>F: 1.02<br>p: 0.319<br>r: 0.15  | M: 2.18<br>F: 0.06<br>p: 0.805<br>r: 0.04  | M: 2.18<br>F: 1.05<br>p: 0.310<br>r: 0.15   | M: 2.18<br>F: 0.059<br>p: 0.446<br>r: 0.11  | M: 2.18<br>F: 0.01<br>p: 0.982<br>r: 0.01   | M: 2.18<br>F: 0.40<br>p: 0.534<br>r: 0.09  | M: 2.18<br>F: 0.08<br>p: 0.778<br>r: 0.04   | M: 2.18<br>F: 0.02<br>p: 0.902<br>r: 0.02  |
| S18 | M: 0.39<br>F: 2.99<br>p: 0.090<br>r: 0.25   | M: 0.39<br>F: 19.39<br>p: 0.001<br>r: 0.54 | M: 0.39<br>F: 0.11<br>p: 0.745<br>r: 0.05  | M: 0.39<br>F: 1.65<br>p: 0.204<br>r: 0.18  | M: 0.39<br>F: 0.38<br>p: 0.845<br>r: 0.03   | M: 0.39<br>F: 0.27<br>p: 0.871<br>r: 0.02   | M: 0.39<br>F: 2.47<br>p: 0.122<br>r: 0.08   | M: 0.39<br>F: 0.47<br>p: 0.496<br>r: 0.10  | M: 0.39<br>F: 1.23<br>p: 0.273<br>r: 0.16   | M: 0.39<br>F: 1.02<br>p: 0.317<br>r: 0.15  |
| S19 | M: 0.69<br>F: 8.86<br>p: 0.005<br>r: 0.40   | M: 0.69<br>F: 6.33<br>p: 0.015<br>r: 0.35  | M: 0.69<br>F: 2.18<br>p: 0.146<br>r: 0.21  | M: 0.69<br>F: 0.85<br>p: 0.363<br>r: 0.13  | M: 0.69<br>F: 0.37<br>p: 0.549<br>r: 0.09   | M: 0.69<br>F: 1.63<br>p: 0.208<br>r: 0.18   | M: 0.69<br>F: 0.32<br>p: 0.579<br>r: 0.08   | M: 0.69<br>F: 0.12<br>p: 0.729<br>r: 0.05  | M: 0.69<br>F: 1.50<br>p: 0.226<br>r: 0.17   | M: 0.69<br>F: 0.86<br>p: 0.357<br>r: 0.13  |
| S20 | M: 10.94<br>F: 5.66<br>p: 0.021<br>r: 0.33  | M: 10.94<br>F: 4.16<br>p: 0.047<br>r: 0.29 | M: 10.94<br>F: 0.13<br>p: 0.719<br>r: 0.05 | M: 10.94<br>F: 0.12<br>p: 0.726<br>r: 0.05 | M: 10.94<br>F: 1.00<br>p: 0.322<br>r: 0.14  | M: 10.94<br>F: 4.33<br>p: 0.043<br>r: 0.29  | M: 10.94<br>F: 0.01<br>p: 0.957<br>r: 0.081 | M: 10.94<br>F: 1.72<br>p: 0.197<br>r: 0.19 | M: 10.94<br>F: 0.07<br>p: 0.797<br>r: 0.04  | M: 10.94<br>F: 0.01<br>p: 0.952<br>r: 0.01 |
| S21 | M: 8.88<br>F: 1.08<br>p: 0.304<br>r: 0.15   | M: 8.88<br>F: 0.97<br>p: 0.330<br>r: 0.14  | M: 8.88<br>F: 0.01<br>p: 0.912<br>r: 0.01  | M: 8.88<br>F: 0.46<br>p: 0.502<br>r: 0.10  | M: 8.88<br>F: 0.02<br>p: 0.901<br>r: 0.02   | M: 8.88<br>F: 2.32<br>p: 0.134<br>r: 0.22   | M: 8.88<br>F: 0.16<br>p: 0.689<br>r: 0.06   | M: 8.88<br>F: 0.26<br>p: 0.615<br>r: 0.07  | M: 8.88<br>F: 0.36<br>p: 0.725<br>r: 0.07   | M: 8.88<br>F: 0.34<br>p: 0.682<br>r: 0.13  |
| S22 | M: 5.49<br>F: 0.90<br>p: 0.347<br>r: 0.14   | M: 5.49<br>F: 3.30<br>p: 0.076<br>r: 0.26  | M: 5.49<br>F: 0.02<br>p: 0.883<br>r: 0.02  | M: 5.49<br>F: 0.14<br>p: 0.707<br>r: 0.05  | M: 5.49<br>F: 0.01<br>p: 0.960<br>r: 0.01   | M: 5.49<br>F: 2.74<br>p: 0.104<br>r: 0.24   | M: 5.49<br>F: 0.08<br>p: 0.773<br>r: 0.04   | M: 5.49<br>F: 0.41<br>p: 0.527<br>r: 0.09  | M: 5.49<br>F: 0.24<br>p: 0.628<br>r: 0.07   | M: 5.49<br>F: 0.34<br>p: 0.563<br>r: 0.09  |
| S23 | M: 2.08<br>F: 1.54<br>p: 0.221<br>r: 0.18   | M: 2.08<br>F: 2.88<br>p: 0.096<br>r: 0.24  | M: 2.08<br>F: 0.090<br>p: 0.765<br>r: 0.04 | M: 2.08<br>F: 0.01<br>p: 0.932<br>r: 0.01  | M: 2.08<br>F: 0.16<br>p: 0.694<br>r: 0.06   | M: 2.08<br>F: 2.23<br>p: 0.142<br>r: 0.21   | M: 2.08<br>F: 0.08<br>p: 0.776<br>r: 0.04   | M: 2.08<br>F: 0.04<br>p: 0.837<br>r: 0.03  | M: 2.08<br>F: 0.50<br>p: 0.482<br>r: 0.10   | M: 2.08<br>F: 0.277<br>p: 0.601<br>r: 0.08 |
| S24 | M: 50.75<br>F: 14.08<br>p: 0.001<br>r: 0.48 | M: 50.75<br>F: 4.93<br>p: 0.031<br>r: 0.31 | M: 50.75<br>F: 1.73<br>p: 0.195<br>r: 0.18 | M: 50.75<br>F: 1.87<br>p: 0.178<br>r: 0.19 | M: 50.75<br>F: 0.21<br>p: 0.652<br>r: 0.07  | M: 50.75<br>F: 0.635<br>p: 0.430<br>r: 0.11 | M: 50.75<br>F: 0.68<br>p: 0.413<br>r: 0.12  | M: 50.75<br>F: 0.54<br>p: 0.467<br>r: 0.11 | M: 50.75<br>F: 2.02<br>p: 0.162<br>r: 0.20  | M: 50.75<br>F: 0.32<br>p: 0.574<br>r: 0.08 |
| S25 | M: 17.26<br>F: 3.30<br>p: 0.076<br>r: 0.26  | M: 17.26<br>F: 0.79<br>p: 0.378<br>r: 0.13 | M: 17.26<br>F: 2.18<br>p: 0.147<br>r: 0.21 | M: 17.26<br>F: 1.04<br>p: 0.313<br>r: 0.15 | M: 17.26<br>F: 3.69<br>p: 0.061<br>r: 0.27  | M: 17.26<br>F: 1.84<br>p: 0.182<br>r: 0.19  | M: 17.26<br>F: 0.30<br>p: 0.875<br>r: 0.02  | M: 17.26<br>F: 2.70<br>p: 0.107<br>r: 0.23 | M: 17.26<br>F: 0.41<br>p: 0.527<br>r: 0.09  | M: 17.26<br>F: 4.66<br>p: 0.036<br>r: 0.31 |
| S26 | M: 67.18<br>F: 9.26<br>p: 0.004<br>r: 0.41  | M: 67.18<br>F: 7.22<br>p: 0.010<br>r: 0.37 | M: 67.18<br>F: 0.27<br>p: 0.603<br>r: 0.06 | M: 67.18<br>F: 0.52<br>p: 0.476<br>r: 0.01 | M: 67.18<br>F: 0.022<br>p: 0.883<br>r: 0.01 | M: 67.18<br>F: 2.24<br>p: 0.141<br>r: 0.05  | M: 67.18<br>F: 0.17<br>p: 0.684<br>r: 0.01  | M: 67.18<br>F: 2.83<br>p: 0.099<br>r: 0.06 | M: 67.18<br>F: 0.093<br>p: 0.762<br>r: 0.01 | M: 67.18<br>F: 1.45<br>p: 0.235<br>r: 0.03 |
| S27 | M: 0.63<br>F: 0.01<br>p: 0.995<br>r: 0.01   | M: 0.63<br>F: 0.22<br>p: 0.638<br>r: 0.07  | M: 0.63<br>F: 5.42<br>p: 0.024<br>r: 0.32  | M: 0.63<br>F: 5.23<br>p: 0.016<br>r: 0.34  | M: 0.63<br>F: 0.01<br>p: 0.913<br>r: 0.02   | M: 0.63<br>F: 0.66<br>p: 0.421<br>r: 0.12   | M: 0.63<br>F: 1.09<br>p: 0.200<br>r: 0.16   | M: 0.63<br>F: 0.39<br>p: 0.535<br>r: 0.09  | M: 0.63<br>F: 4.36<br>p: 0.042<br>r: 0.30   | M: 0.63<br>F: 0.273<br>p: 0.604<br>r: 0.08 |

**Table S5. Analysis of the responses of the first stage from framework of DCs for Spain public research institutes.**

| <i>Sensing</i>         |                                  |    |          |                                                |     |
|------------------------|----------------------------------|----|----------|------------------------------------------------|-----|
| Question               |                                  | %  | Question |                                                | %   |
| Q4                     | Basic science                    | 43 | Q11      | Environment scanning                           | 29  |
| Q5                     | Applied research                 | 31 | Q12      | Benchmarkig                                    | 7   |
| Q6                     | R&D                              | 26 | Q13      | Bibliometrics                                  | 50  |
| Q7                     | Scientific literature review     | 64 | Q14      | Researchers experience                         | 50  |
| Q8                     | Relevance studies                | -  | Q15      | Academic events                                | 57  |
| Q9                     | Market studies                   | 14 | Q16      | Networks colaboration (national/international) | 100 |
| Q10                    | SWOT analysis                    | 14 |          |                                                |     |
| <i>Seizing</i>         |                                  |    |          |                                                |     |
| Question               |                                  | %  | Question |                                                | %   |
| Q17                    | Short term research              | 31 | Q19      | Long term research                             | 29  |
| Q18                    | Medium term research             | 40 |          |                                                |     |
| <i>Reconfiguration</i> |                                  |    |          |                                                |     |
| Question               |                                  | %  | Question |                                                | %   |
| Q20                    | Industry related projects        | 64 | Q26      | Delphi                                         | -   |
| Q21                    | Public services related projects | 50 | Q27      | Surveys                                        | 21  |
| Q22                    | Projects by gubernamental calls  | 93 | Q28      | Trends extrapolation                           | 14  |
| Q23                    | Relevance trees studies          | 7  | Q29      | Cross-impact analysis                          | 35  |
| Q24                    | Expert panels                    | 64 | Q30      | Time series analysis                           | 14  |
| Q25                    | Brainstorming                    | 14 | Q31      | Scenarios building                             | 14  |
